# Supplementary material
Source: MDPI journal article supplement (https://www.mdpi.com/2311-7524/8/12/1173)
Supplement: s1 [file s1]

## Supplementary Materials

Table S1: Information about primers used for qPCR in this study;

Table S2: Results of three-way ANOVA;

Figure S1: The standard curve for converting cycle threshold (Ct) values to the concentration of *Acidovorax citrulli* cells, using quantitative real-time PCR (qPCR);

Figure S2: The standard curve for converting cycle threshold (Ct) values to the concentrations of *Acidovorax citrulli* strains pslb65 and Aac5 using quantitative real-time PCR.

**Table S1 Information about primers used for qPCR in this study**

| Primer name           | Primer sequence (5'-3')                | Product length | Purpose          |
|-----------------------|----------------------------------------|----------------|------------------|
| 65- <i>pilA</i> -18-L | CTATGACATGATTAC <u>CGAATTC</u> GAAGGGG | 599 bp         | Clone the pslb65 |
|                       | CGAAGGACCAG                            |                |                  |
| 65- <i>pilA</i> -18-R | ACGACGGCCAGTGCC <u>AAGCTT</u> CCGCCA   | 599 bp         | <i>pilA</i> gene |
|                       | CAGGTCCATTCA                           |                | fragment         |
| A5- <i>pilA</i> -18-L | CTATGACATGATTAC <u>CGAATTC</u> AATTGTC | 592 bp         | Clone the Aac5   |
|                       | ACTCCCGCCCG                            |                |                  |
| A5- <i>pilA</i> -18-R | ACGACGGCCAGTGCC <u>AAGCTT</u> GCCAAAC  | 592 bp         | <i>pilA</i> gene |
|                       | TTGCTGCCCCAT                           |                | fragment         |
| 18F                   | CAGGAAACAGCTATGAC                      | —              | pK18 plasmid     |
| 18R                   | GTAAAACGACGGCCAGT                      |                | sequencing       |
| pslb65-F              | CCGAGCAGGTTCAAAGCA                     | 138 bp         | qPCR of pslb65   |
| pslb65-R              | TCACGCCGTTGTCAGTAG                     |                | <i>pilA</i>      |
| AAC00-1-F             | CCATCACGGAAATCTATCAA                   | 95 bp          | qPCR of Aac5     |

Note: The restriction enzyme sites were underlined

Table S2 Results of three-way ANOVA

| Source       | Df | Square sum  | Mean square | F value | Pr>F    |
|--------------|----|-------------|-------------|---------|---------|
| Group        | 1  | 10.84604444 | 10.84604444 | 6.31    | 0.0199  |
| Strains      | 4  | 92.00435556 | 23.00108889 | 13.38   | <0.0001 |
| Host         | 1  | 7.91484444  | 7.91484444  | 4.60    | 0.042   |
| Group * host | 1  | 44.71151111 | 44.71151111 | 26.0    | <0.0001 |

Note:  $R^2 = 0.813643$ .

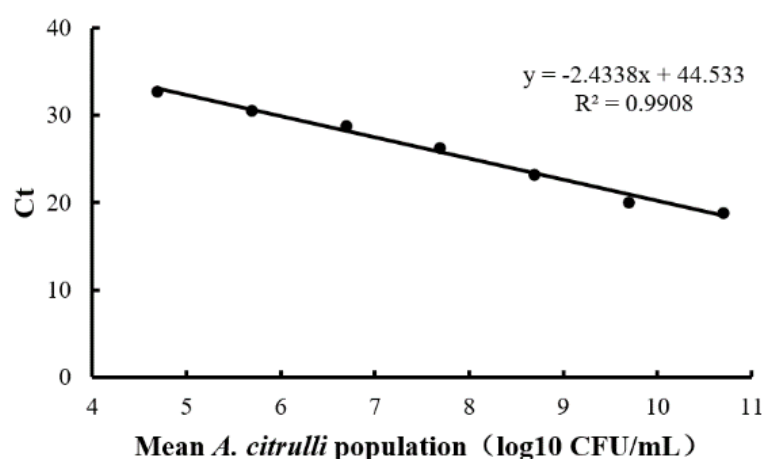

Figure S1. The standard curve for converting cycle threshold (Ct) values to the concentration of *Acidovorax citrulli* cells, using quantitative real-time PCR (qPCR). A 10  $\mu$ L pslb65 suspension from ten-fold serial dilutions was spread on King's B agar plate amended with ampicillin to calculate the number of colonies. qPCR was conducted using an *A. citrulli*-specific assay to obtain the Ct values. The experiment was performed three times. Linear regression was conducted and the equation for the regression line was used to calculate log<sub>10</sub>CFU/mL.

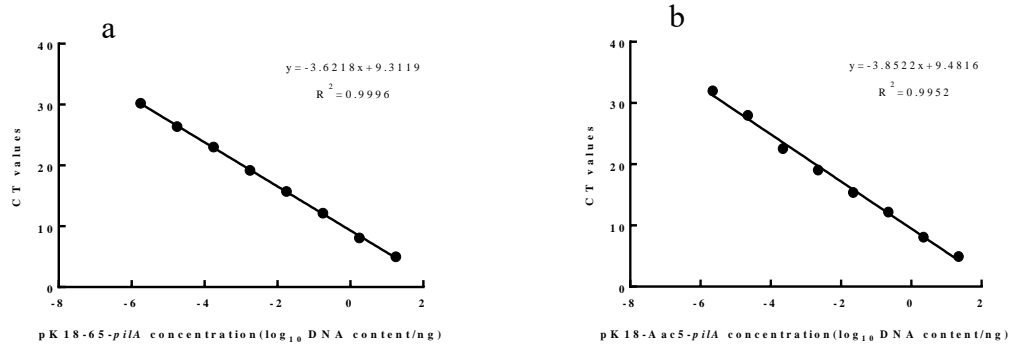

Figure S2. The standard curve for converting cycle threshold (Ct) values to the concentrations of *Acidovorax citrulli* strains pslb65 and Aac5 using quantitative real-time PCR. a. The template is pK18-pslb65-pilA. b. The template is pK18-Aac5-pilA. The constructed plasmids (pK18-pslb65-pilA and pK18-Aac5-pilA) were ten-fold serial diluted with DEPC water, and 8 ten-fold serial dilutions ( $10^0$ – $10^{-7}$ ) were used as templates. The qPCR reaction was carried out with SuperReal PreMix Plus. Three technical repeats were made for each concentration gradient. The experiment was performed three times.
